# Supplementary material for: Fluorescence activated enrichment of CD146+ cells during expansion of human bone-marrow derived mesenchymal stromal cells augments proliferation and GAG/DNA content in chondrogenic media
Source: PubMed Central journal article supplement (PMC4196082; doi:10.1186/1471-2474-15-322), 2014-09-27

**a**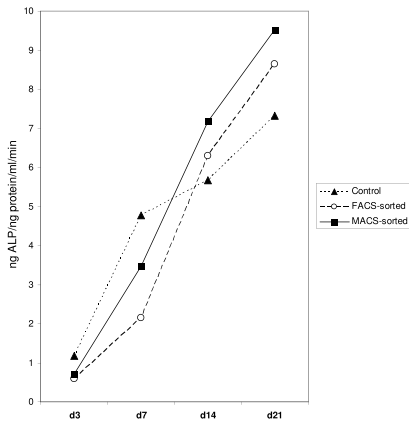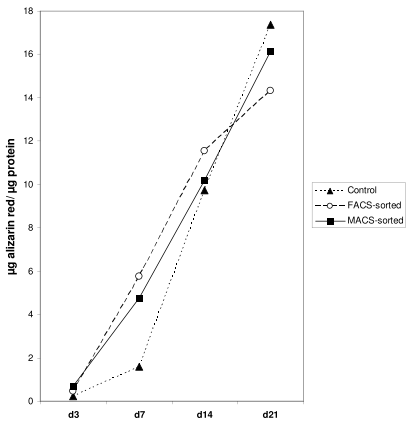**b****P2**

unsorted

FACS

MACS

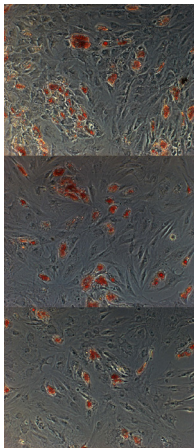**C**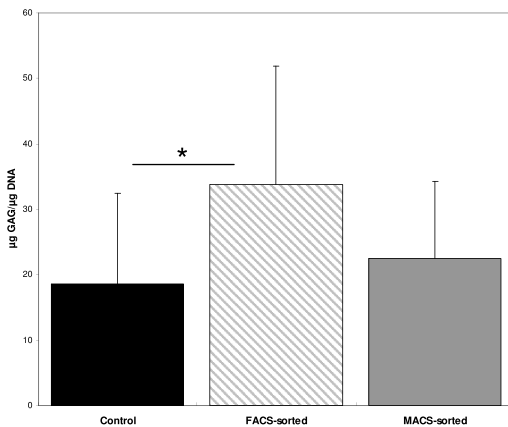

Supplement: 12891_2014_2269_MOESM4_ESM.pdf [file 12891_2014_2269_MOESM4_ESM.pdf]
